# Supplementary material for: Characterization of the Mitochondrial Genome of a Wheat AL-Type Male Sterility Line and the Candidate CMS Gene
Source: MDPI journal article supplement (doi:10.3390/ijms22126388), 2021-06-15
Supplement: s1 [file s1]

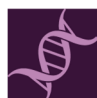

Article

# Characterization of the **mitochondrial** genome of a wheat AL-type male sterility line and the candidate CMS gene

Miaomiao Hao <sup>1,2,†</sup>, Wenlong Yang <sup>1,3,†,\*</sup>, Weiwen Lu <sup>1,2</sup>, Linhe Sun <sup>1,2,4</sup>, Muhammad Shoaib <sup>1,2</sup>, Jiazhu Sun <sup>1</sup>, Dongcheng Liu <sup>1</sup>, Xin Li <sup>1</sup> and Aimin Zhang <sup>1,\*</sup>

<sup>1</sup>State Key Laboratory of Plant Cell and Chromosome Engineering, Institute of Genetics and Developmental Biology/Innovative Academy of Seed Design, Chinese Academy of Sciences, Beijing, 100101, China;

<sup>2</sup>University of Chinese Academy of Sciences, Beijing, 100049, China;

<sup>3</sup>Institute of Vegetables and Flowers, Chinese Academy of Agricultural Sciences, Beijing, 100081, China;

<sup>4</sup>Institute of Botany, Jiangsu Province and Chinese Academy of Sciences (Nanjing Botanical Garden Mem. Sun Yat-Sen), Nanjing, 210014, China;

† These authors contributed equally to this work.

\* Correspondence: Aimin Zhang (amzhang@genetics.ac.cn, 008610-64806618), Wenlong Yang (wlyang@genetics.ac.cn, 008610-64806617)

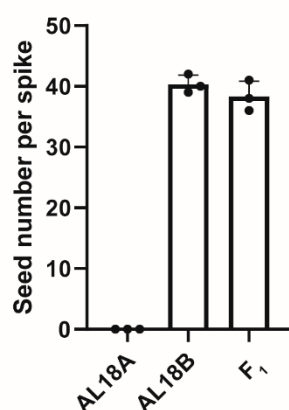

**Figure S1.** Seeds setting of AL18A, AL18B and F<sub>1</sub> (AL18A × AL18B).

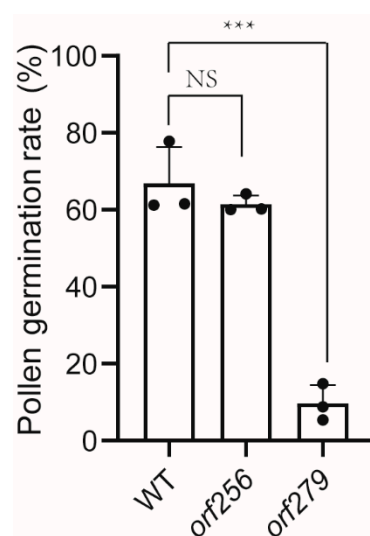

**Figure S2.** Pollen germination rate of WT, transgenic plants of *orf256* and *orf279*, respectively. Student *t*-test was used for pollen germination rate comparison between wild-type (WT) *Arabidopsis* and transgenic plants of *orf256* and *orf279* individually. NS ( $P = 0.3929$ ), non-significant difference. \*\*\* $P = 0.0007$ . Data are means ± S.D.  $n = 3$  independent plants.
